# Supplementary material for: Inhibition of mitochondrial protein import and proteostasis by a pro-apoptotic lipid
Source: eLife journal article supplement (doi:10.7554/elife.93621), 2024-01-09
Supplement: fig4-data1 [file elife-93621-fig4-data1-v1.pdf]

**Figure 4D**

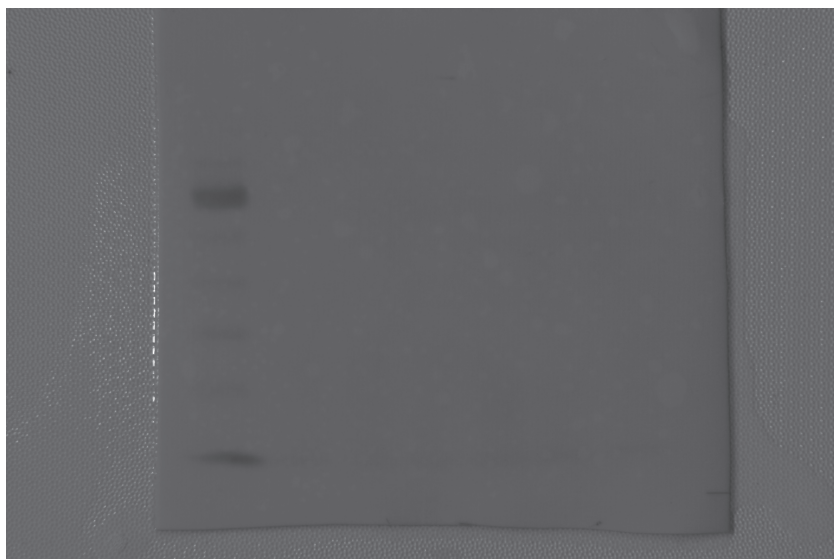

Protein ladder

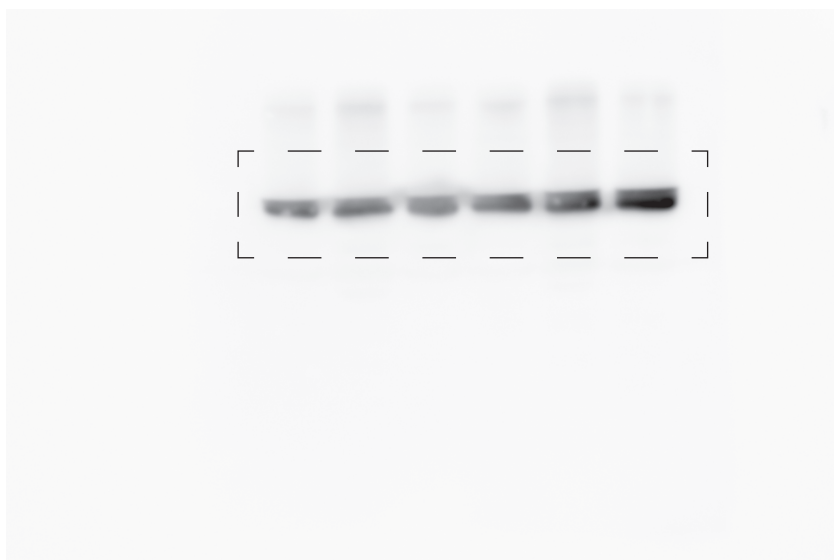

Relevant bands

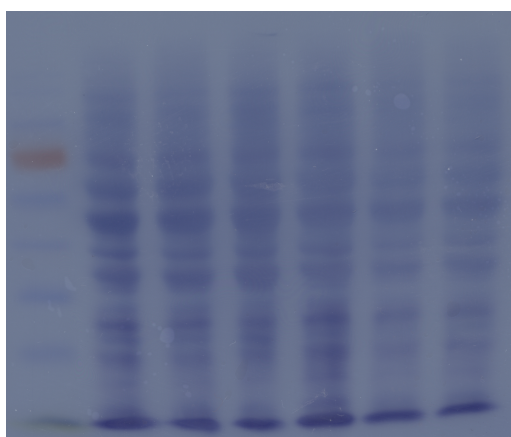

DB71 stain
