# Supplementary material for: Inhibition of mitochondrial protein import and proteostasis by a pro-apoptotic lipid
Source: eLife journal article supplement (doi:10.7554/elife.93621), 2024-01-09
Supplement: fig5-data1 [file elife-93621-fig5-data1-v1.pdf]

Figure 5A - Aim17

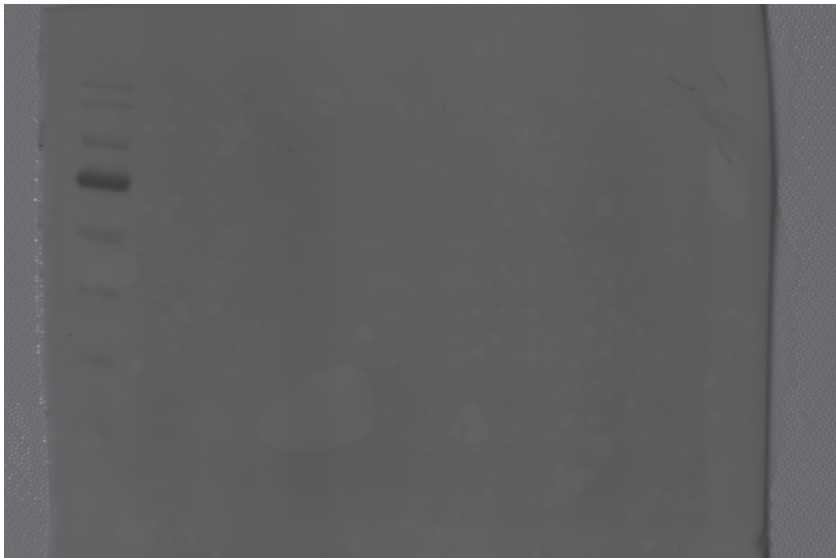

Protein ladder

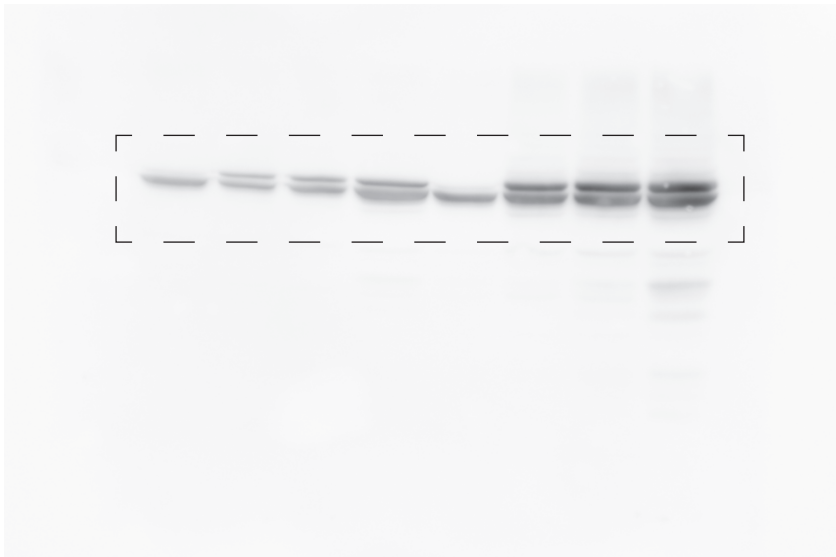

Relevant bands

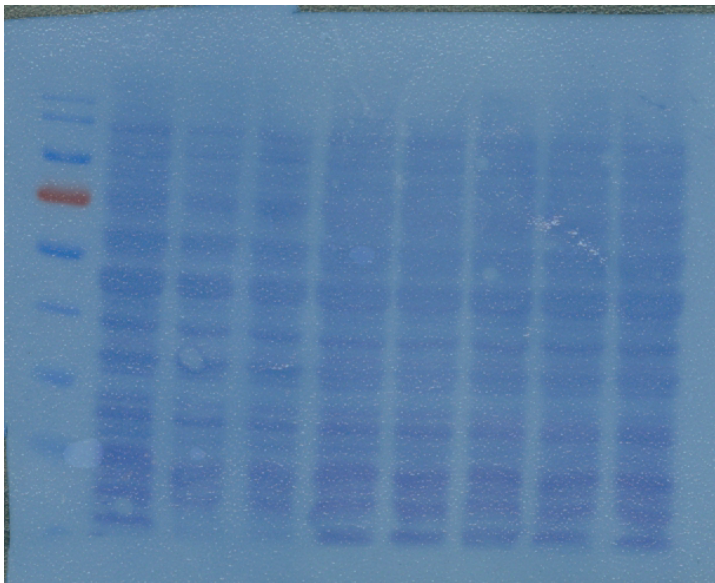

DB71 stain

Figure 5A - Cox5a

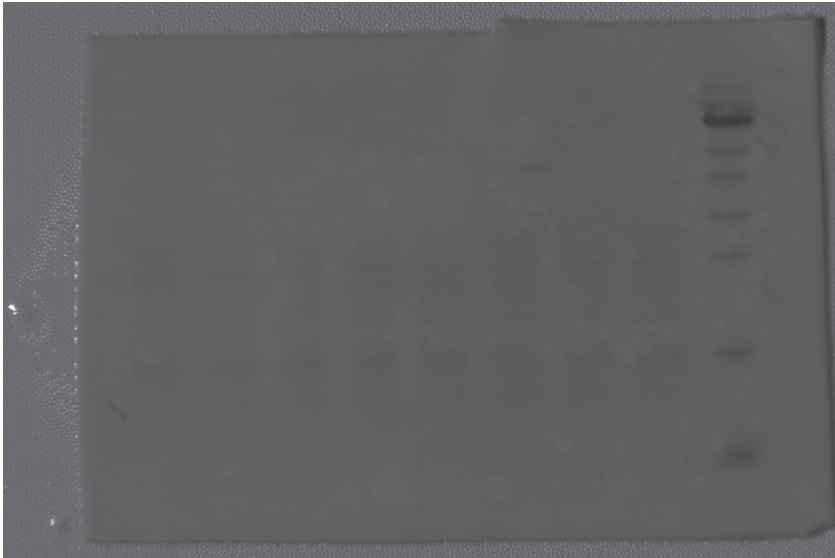

Protein ladder

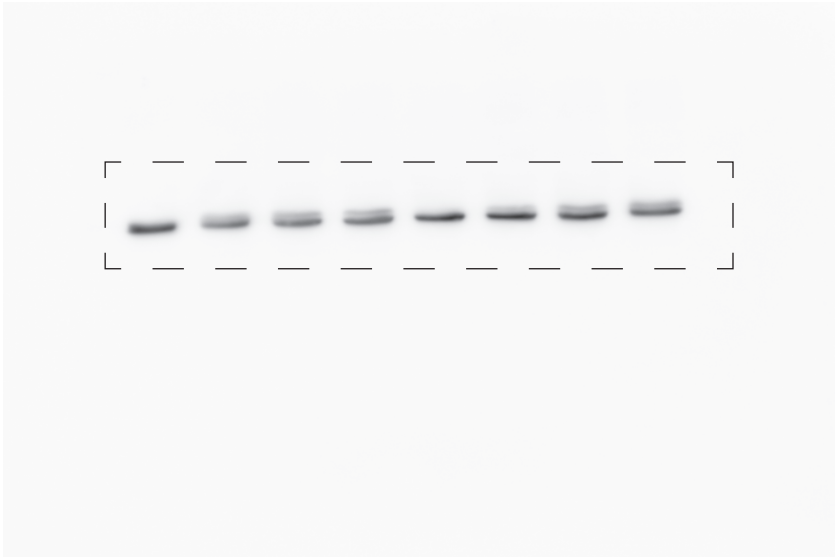

Relevant bands

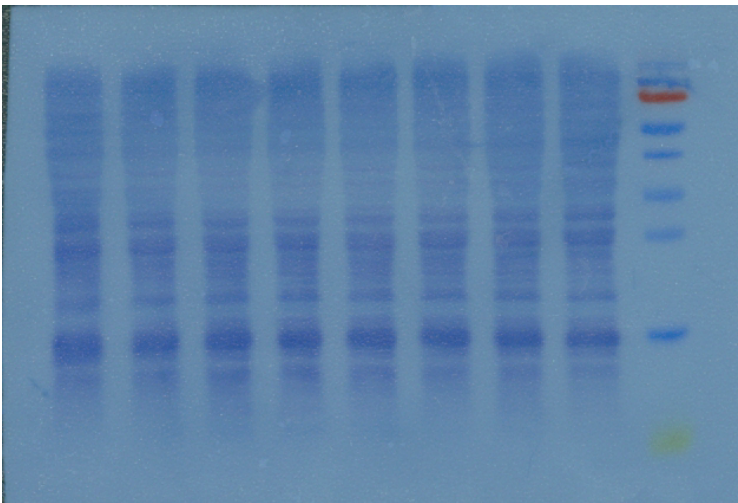

DB71 stain



Figure 5A - Ilv6

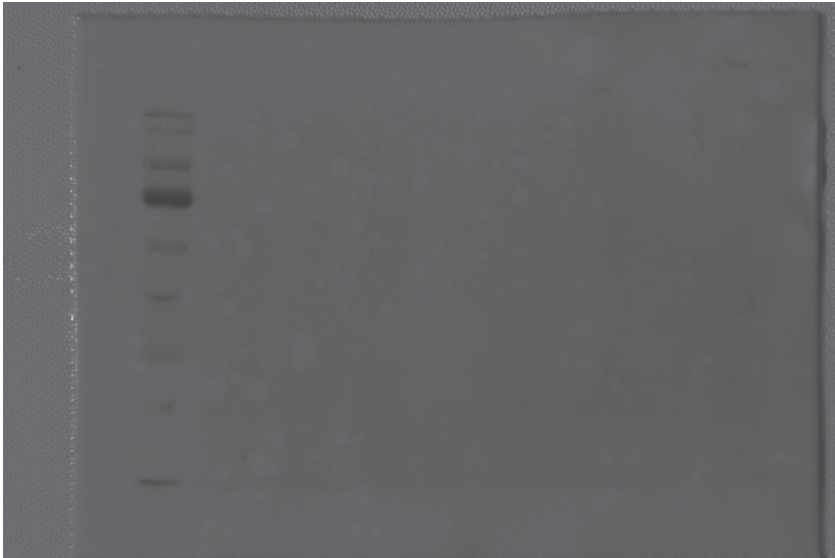

Protein ladder

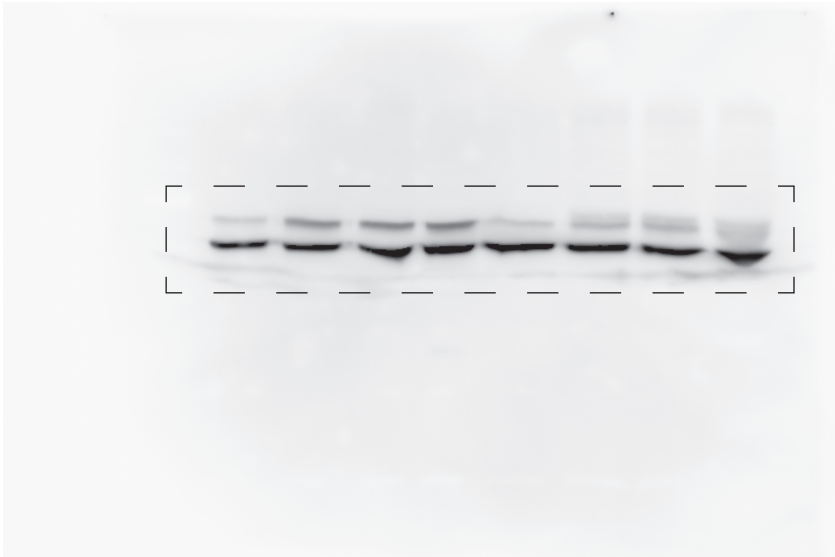

Relevant bands

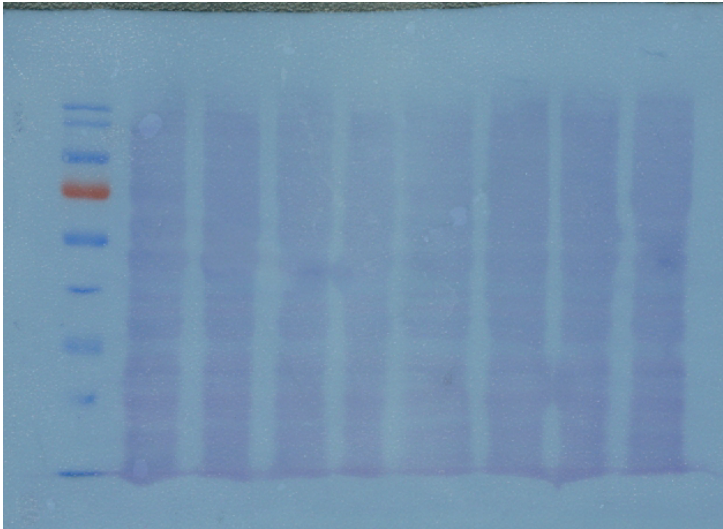

DB71 stain

Figure 5B - Aim17

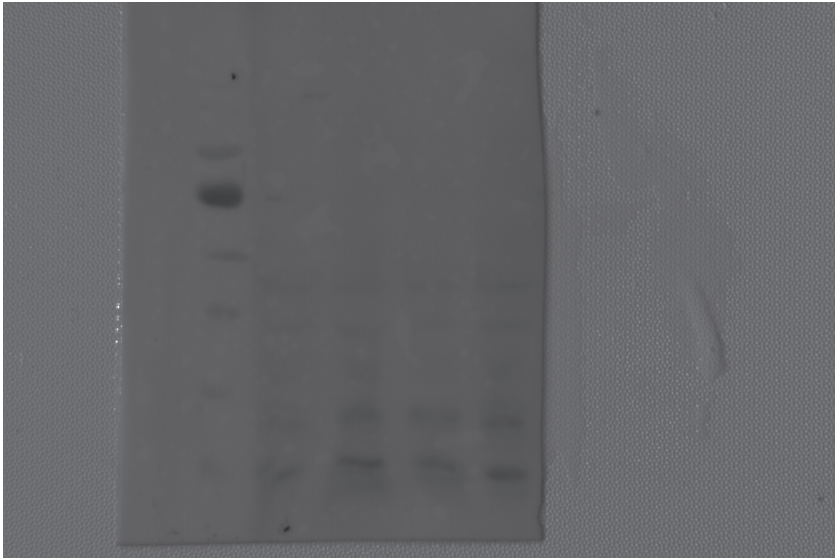

Protein ladder

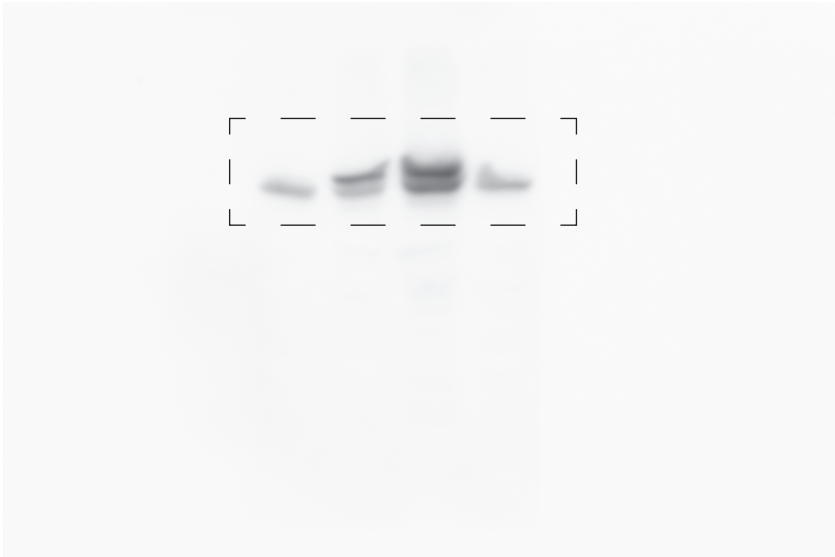

Relevant bands

Figure 5B - Cox5a

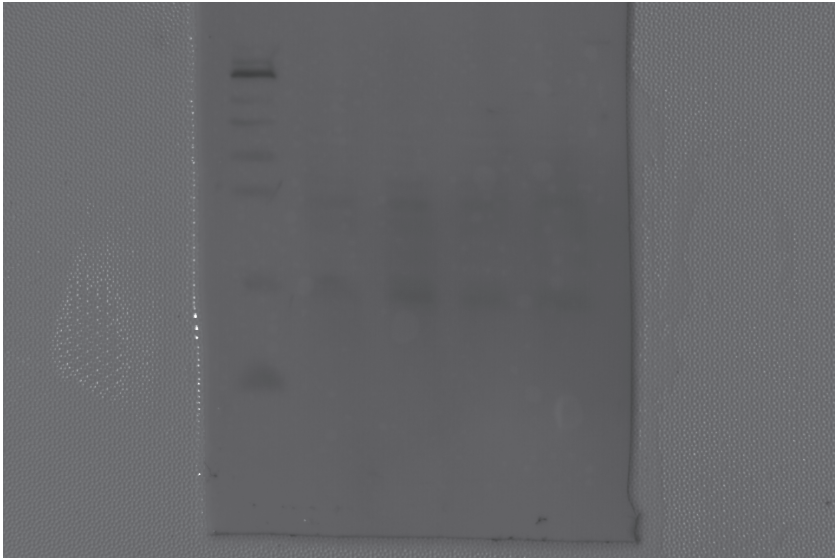

Protein ladder

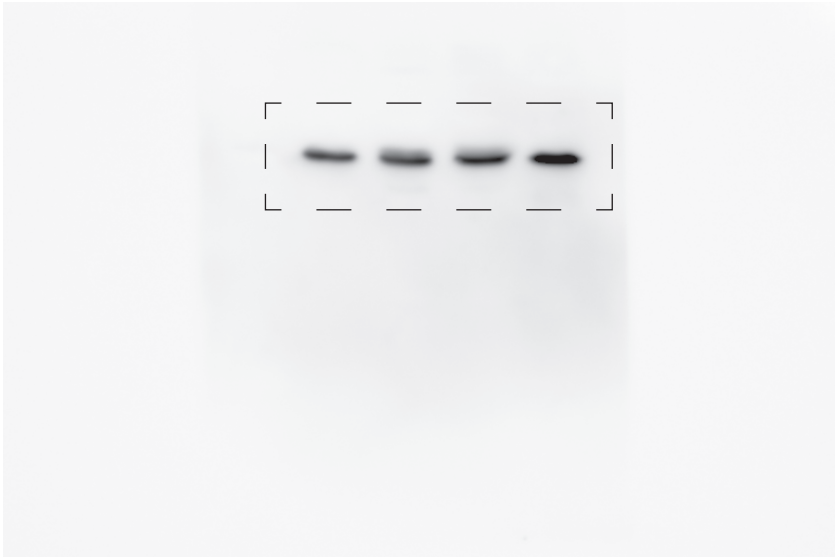

Relevant bands

Figure 5B - Ilv6

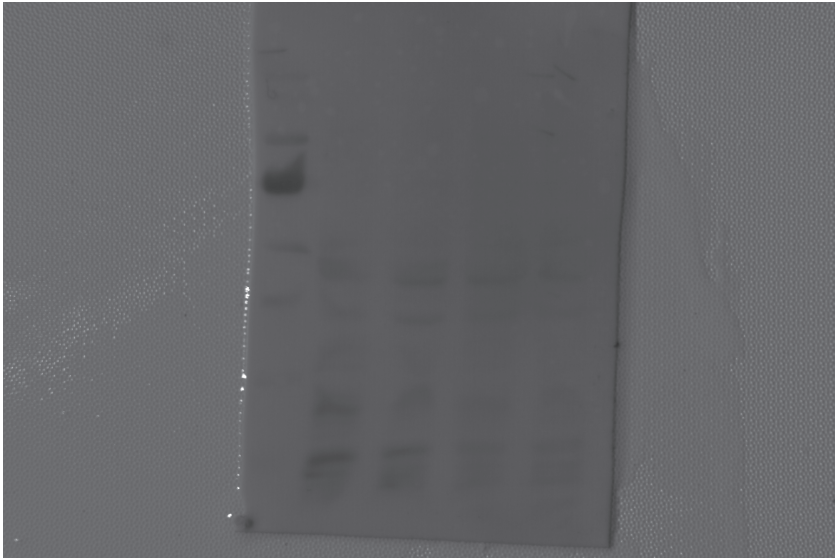

Protein ladder

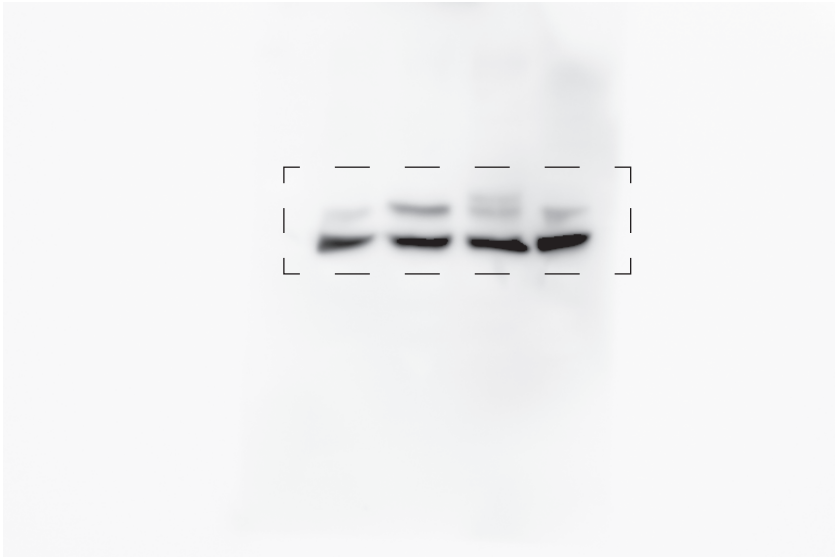

Relevant bands



Figure 5B - Sdh4

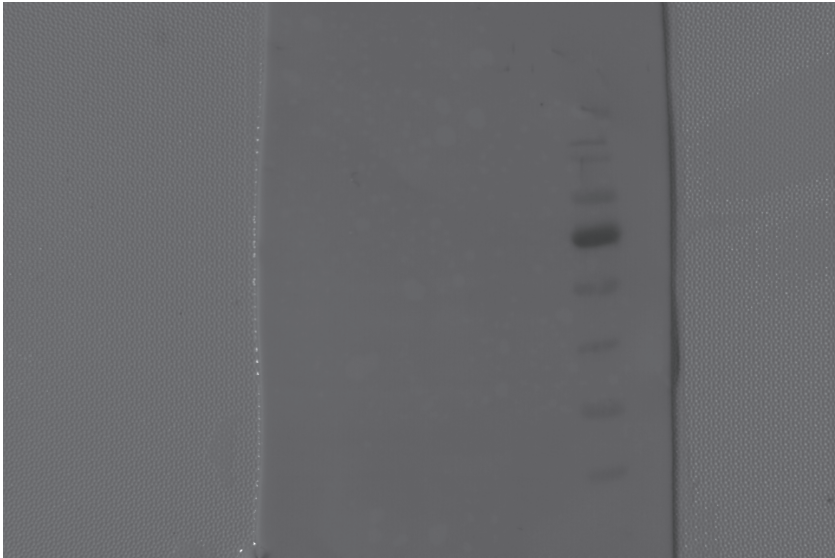

Protein ladder

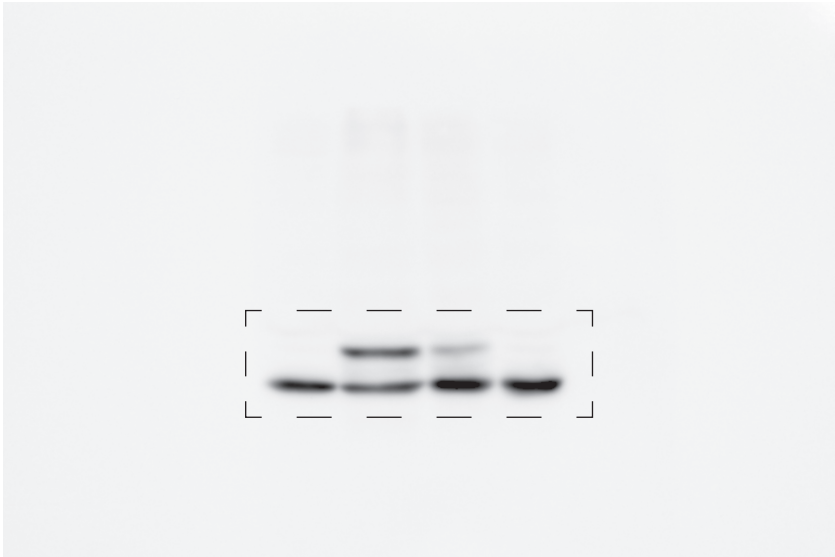

Relevant bands

Figure 5D - Aim17

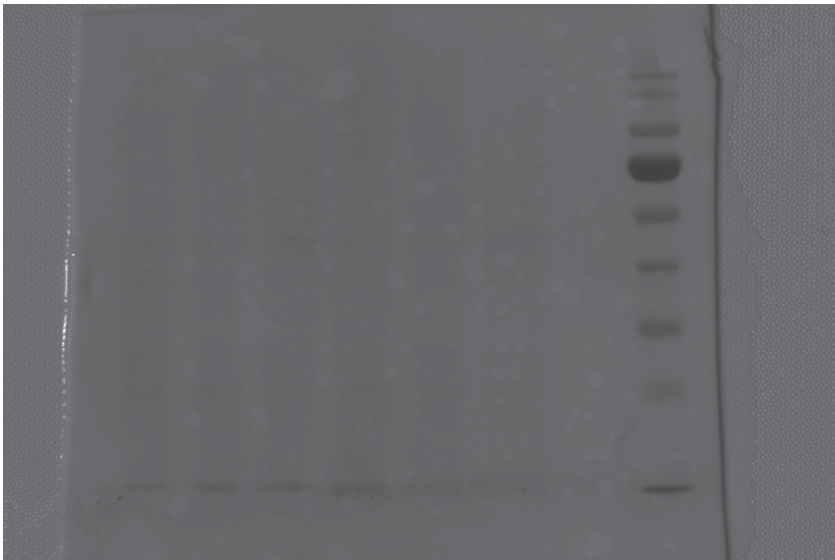

Protein ladder

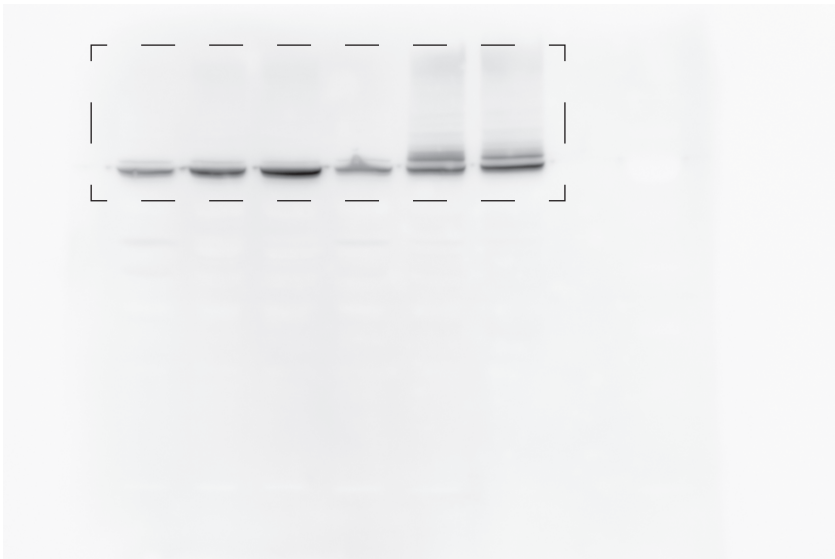

Relevant bands

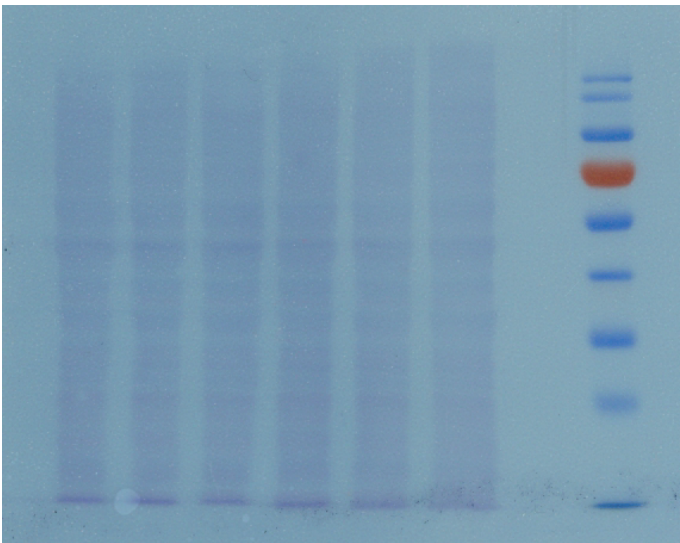

DB71 stain

Figure 5D - Cyc7

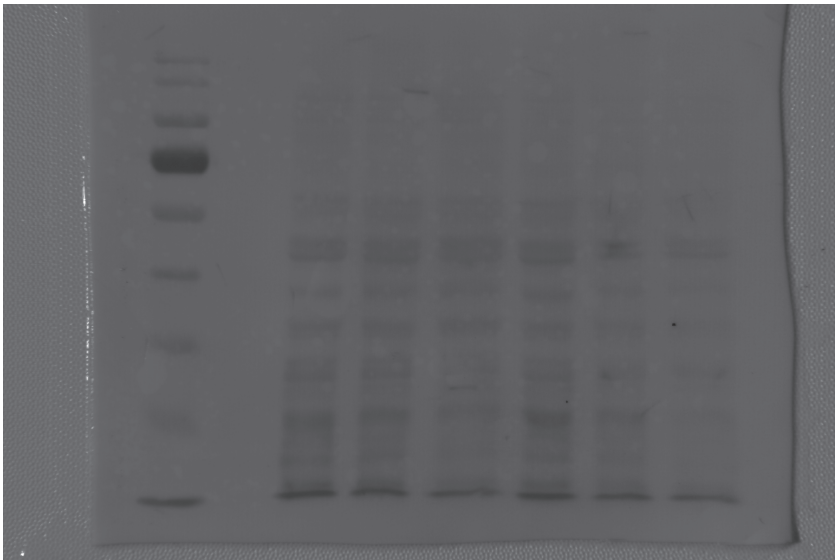

Protein ladder

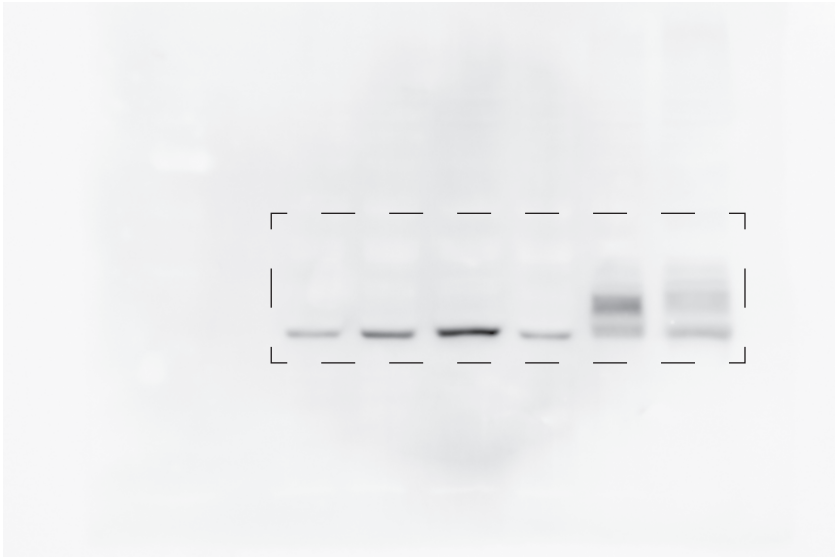

Relevant bands

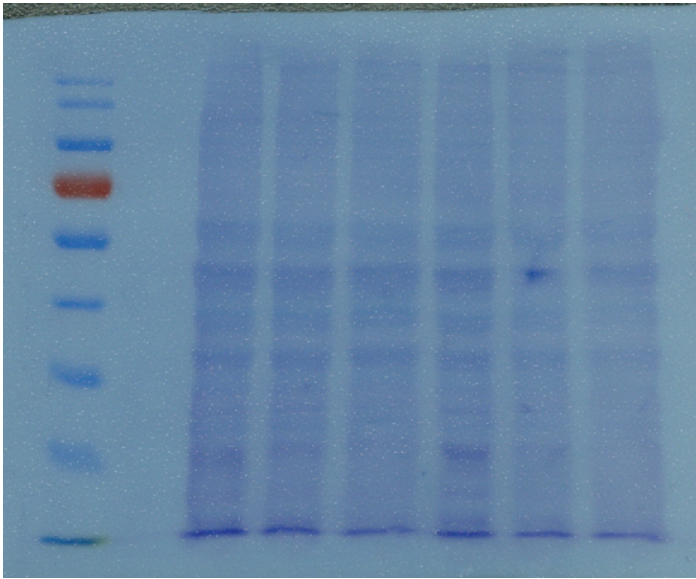

DB71 stain

Figure 5D - Sdh4

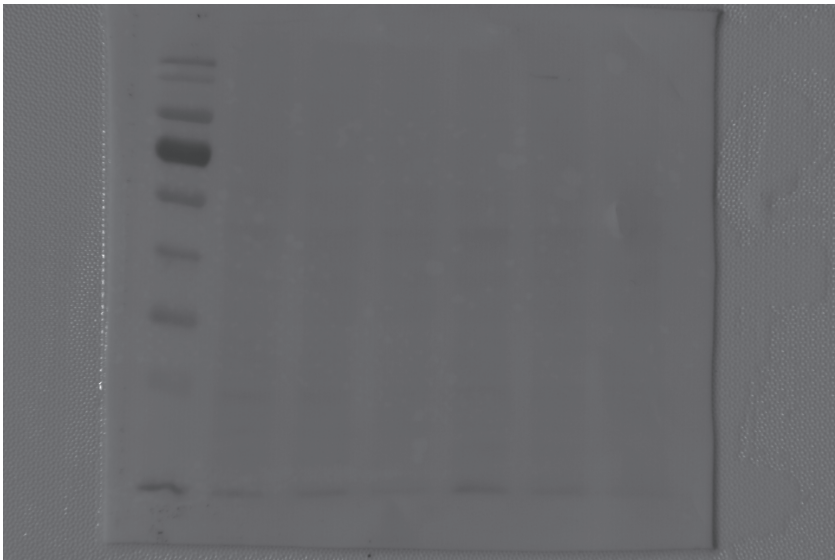

Protein ladder

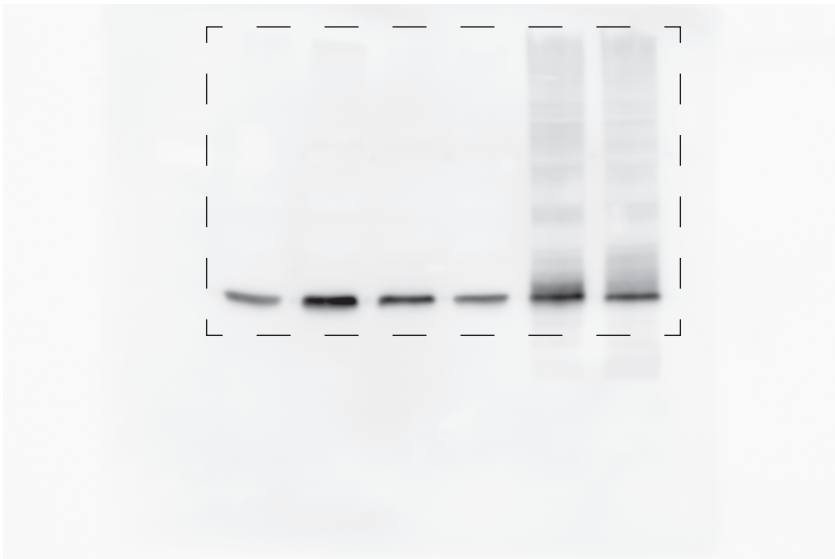

Relevant bands

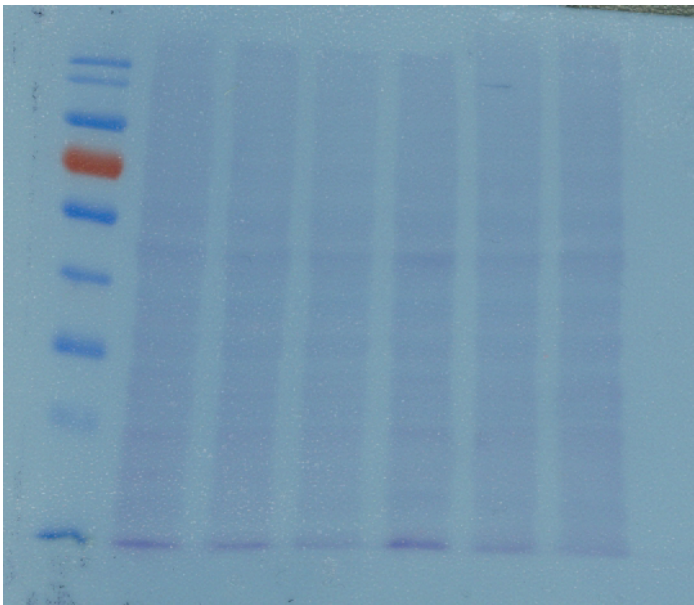

DB71 stain



Figure 5E - Aim17

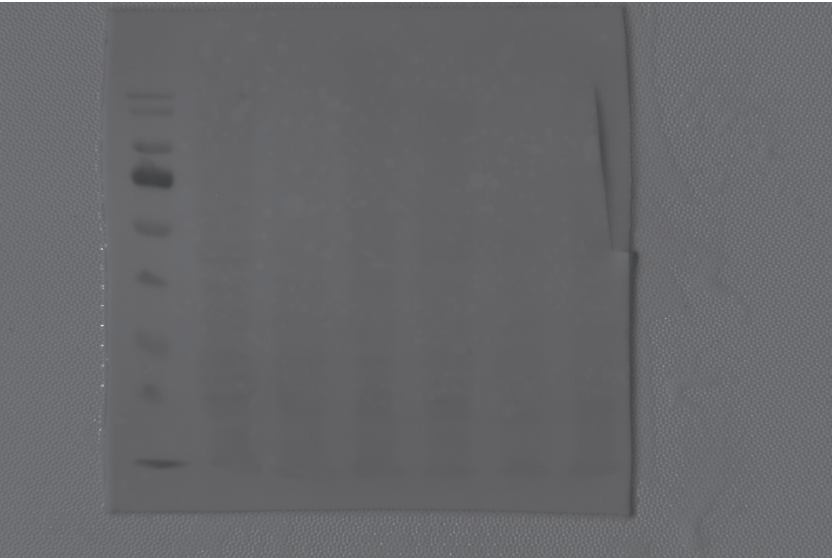

Protein ladder

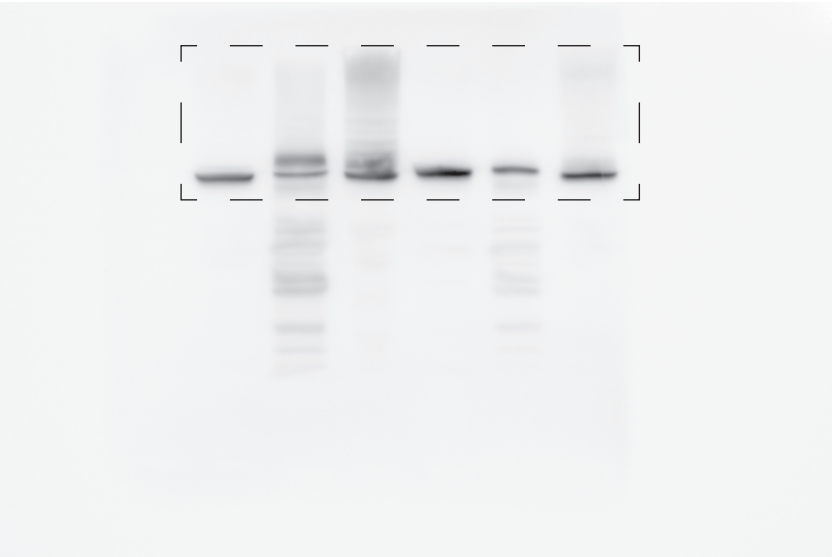

Relevant bands

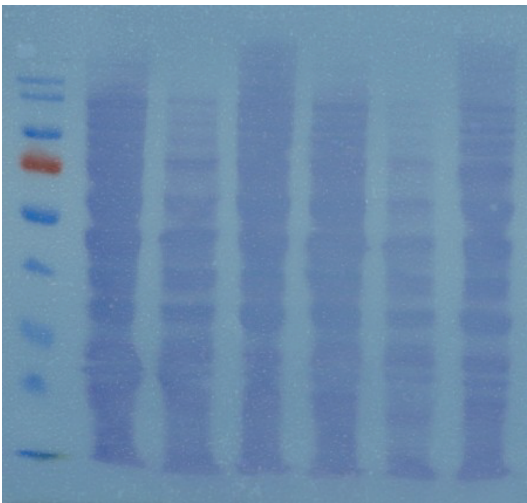

DB71 stain

Figure 5E - Mpc3

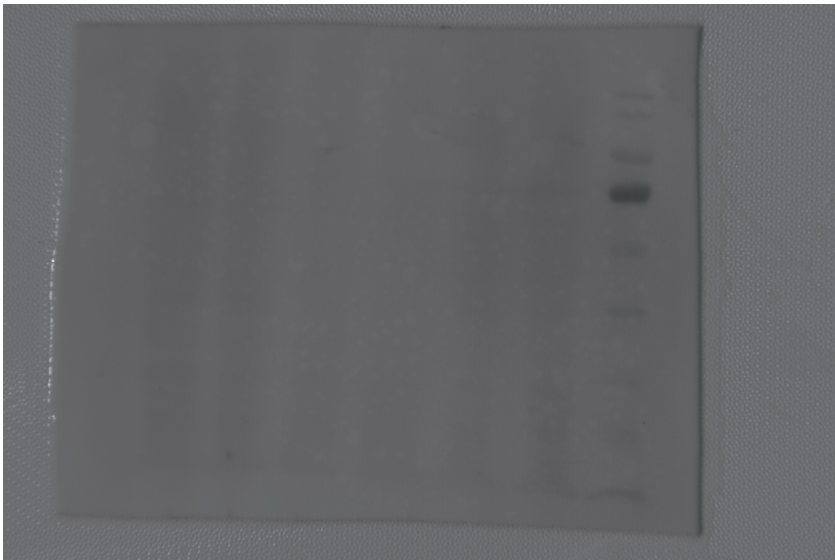

Protein ladder

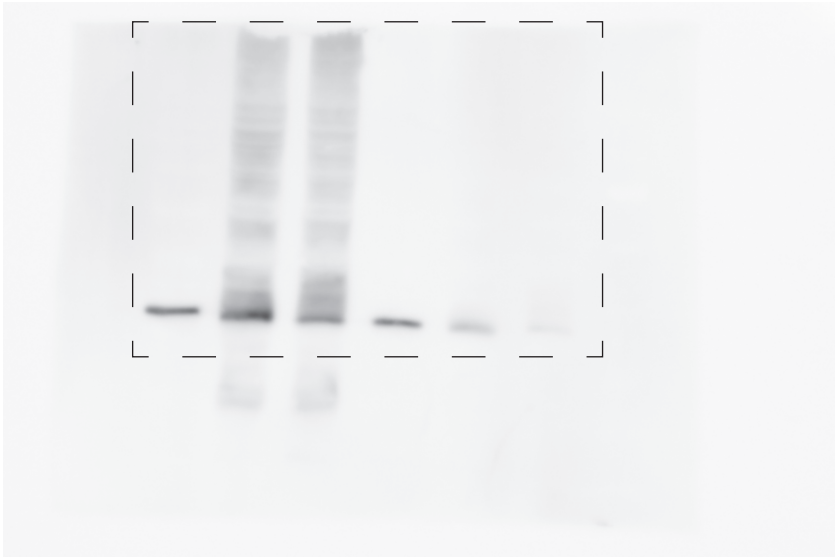

Relevant bands

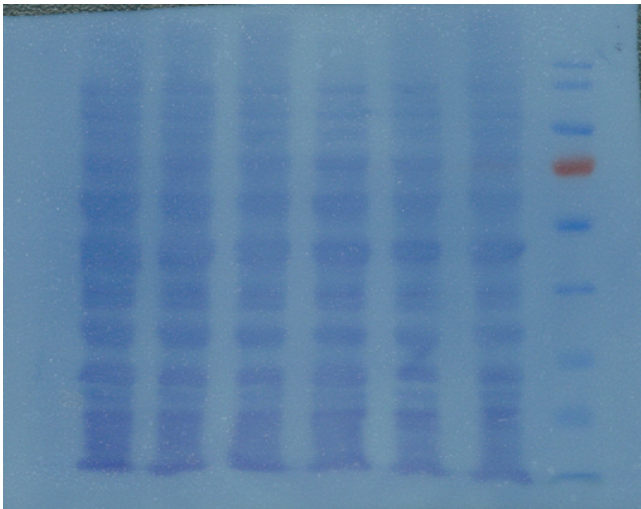

DB71 stain

Figure 5F - Cis1

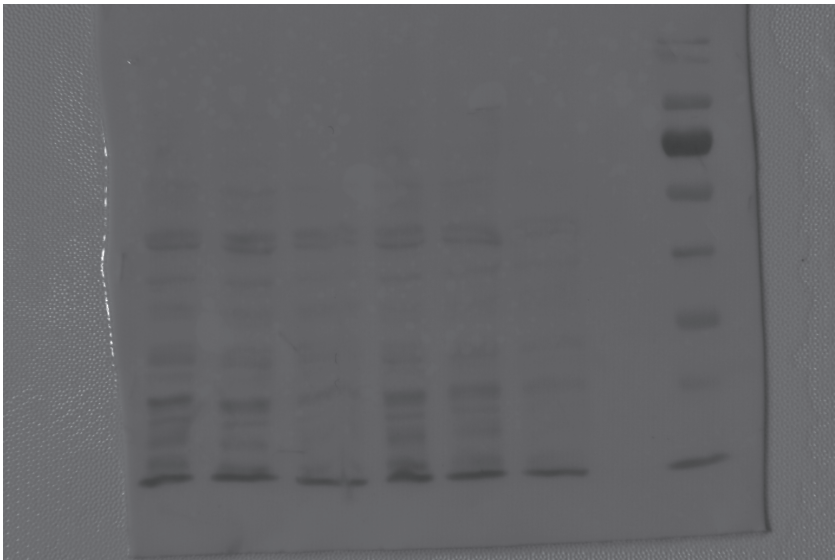

Protein ladder

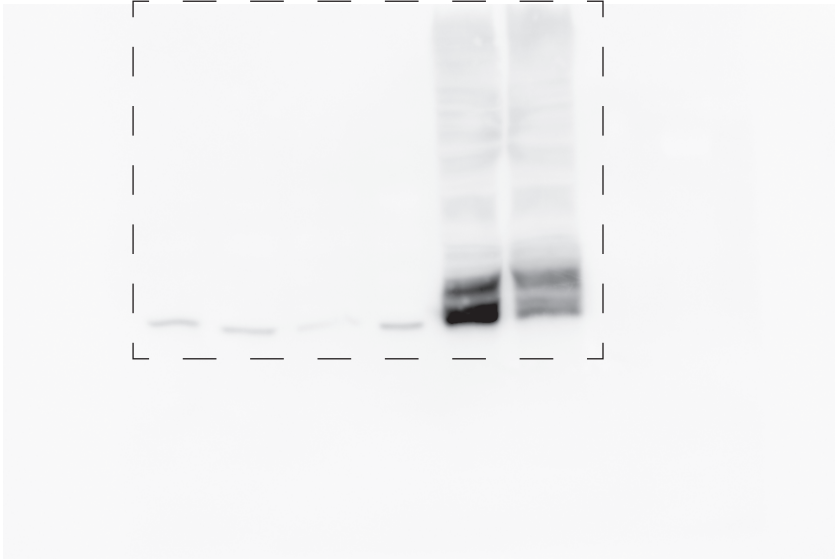

Relevant bands

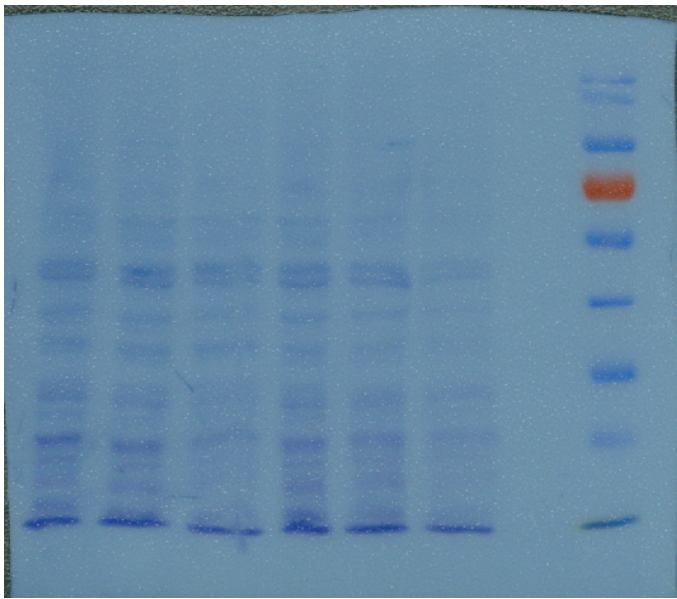

DB71 stain

Figure 5F - Tma10

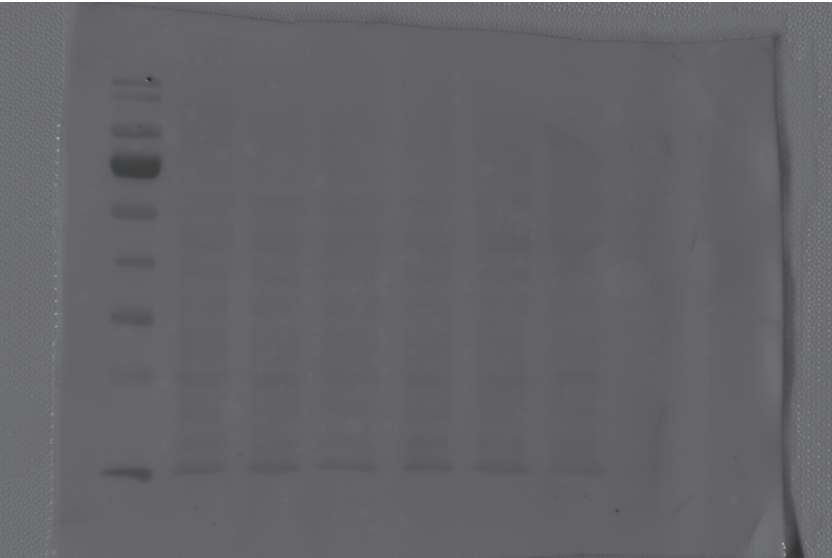

Protein ladder

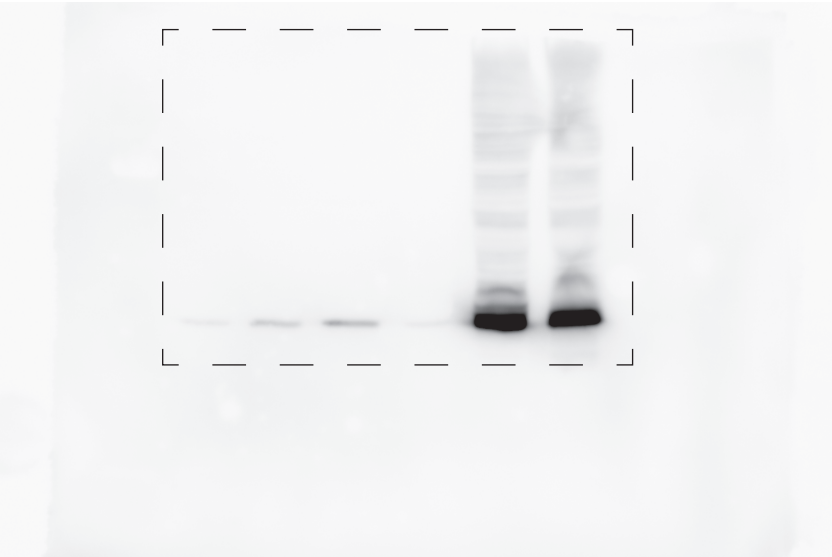

Relevant bands

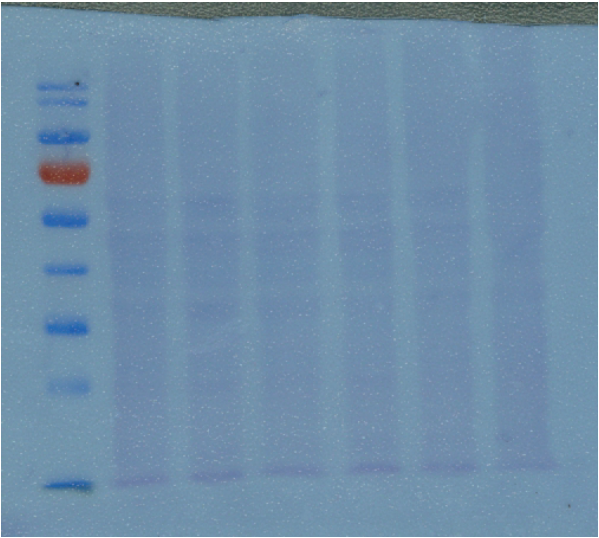

DB71 stain



Figure 5G - WT

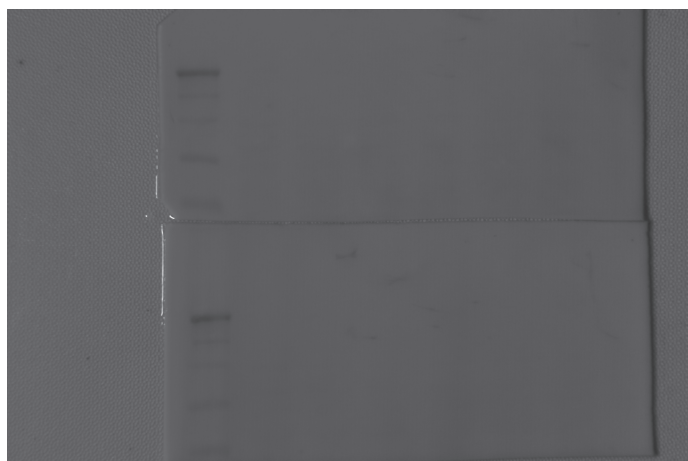

Protein ladder

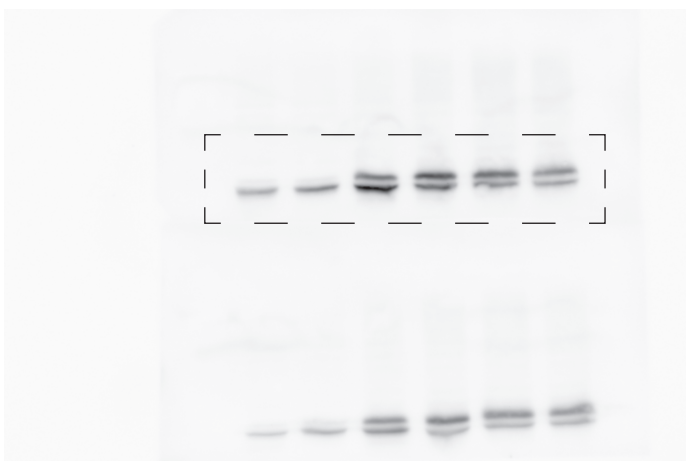

Relevant bands - TAP

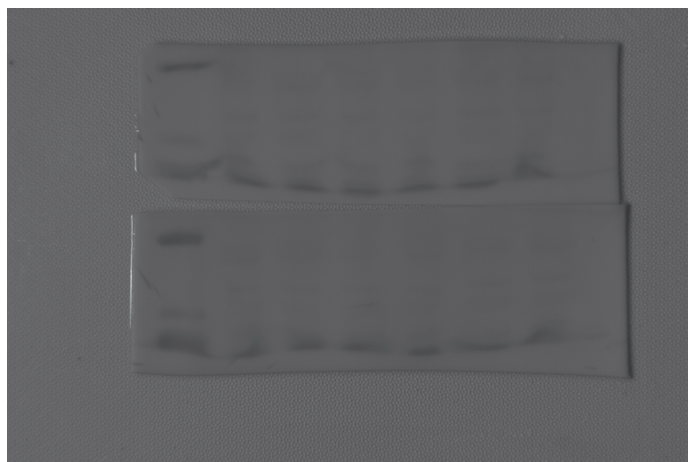

Protein ladder

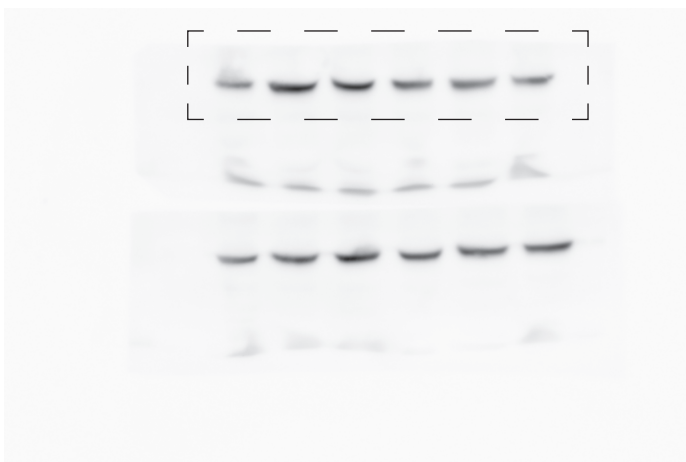

Relevant bands - Pgk1

Figure 5G - *hfd1*Δ

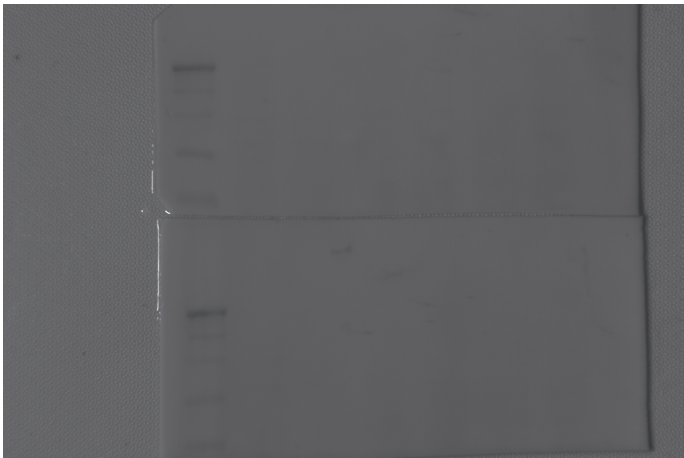

Protein ladder

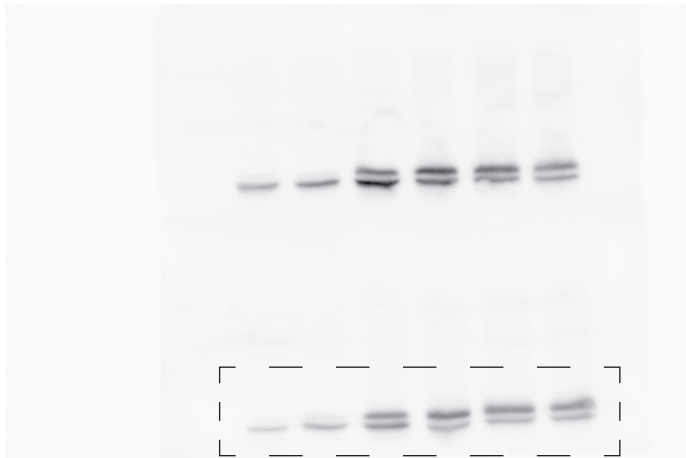

Relevant bands - TAP

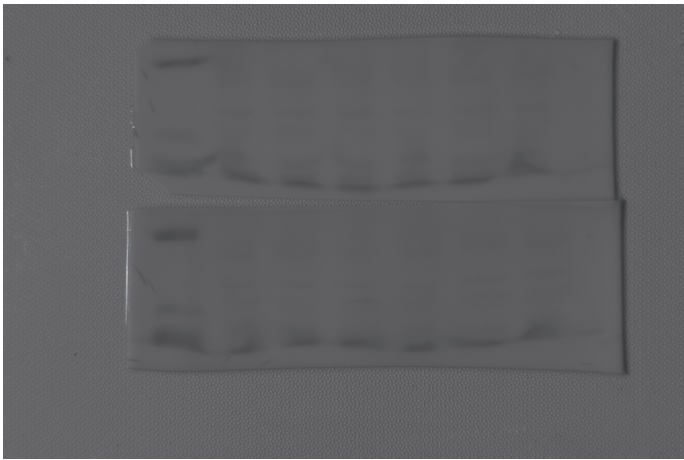

Protein ladder

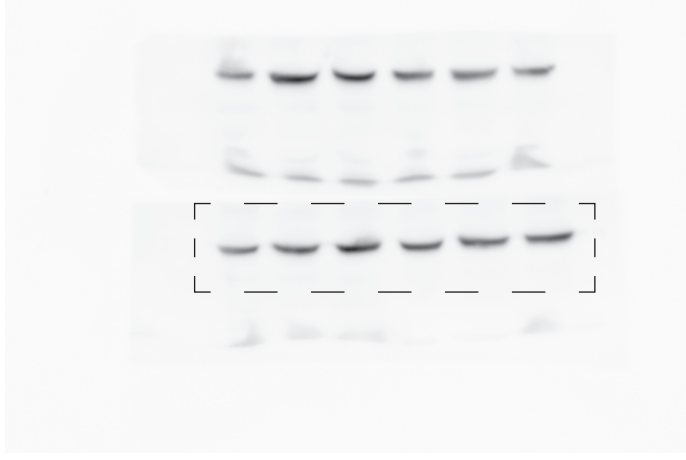

Relevant bands - Pgk1

Figure 5G - *TDH3p-HFD1*

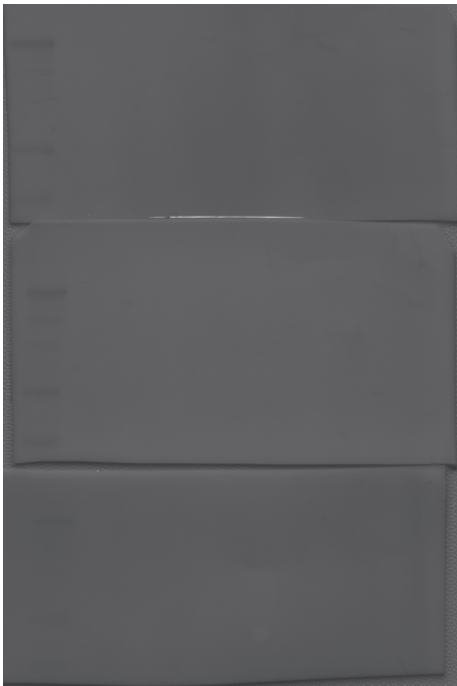

Protein ladder

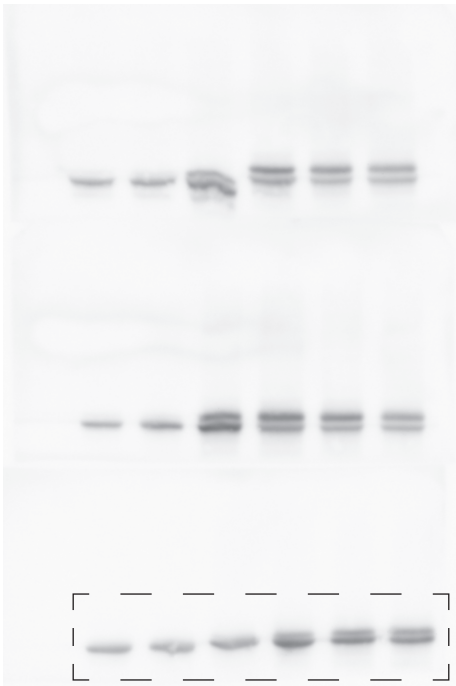

Relevant bands - TAP

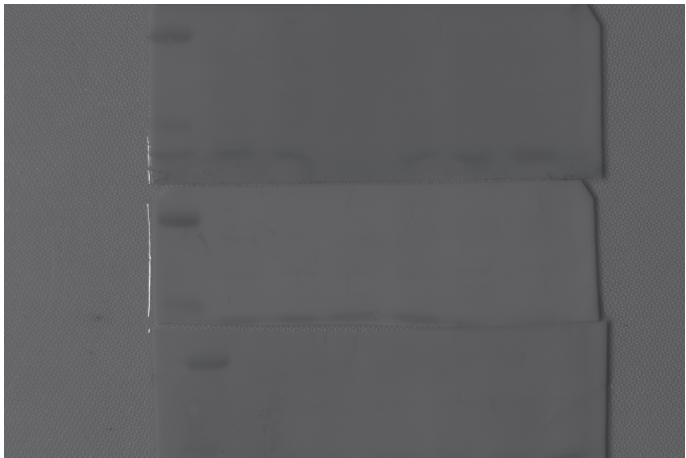

Protein ladder

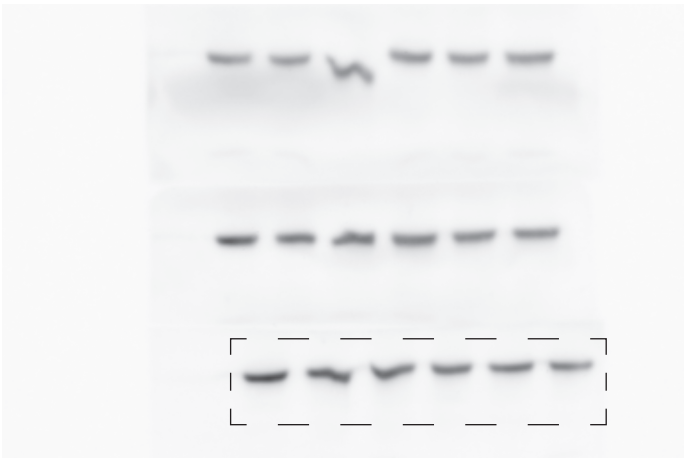

Relevant bands - Pgk1

Figure 5H

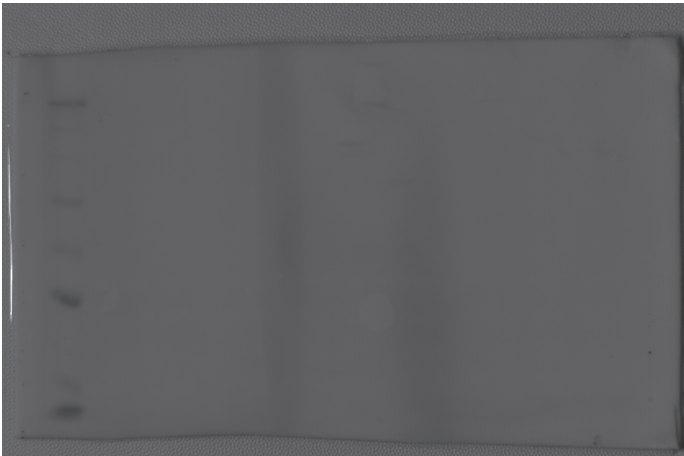

Protein ladder

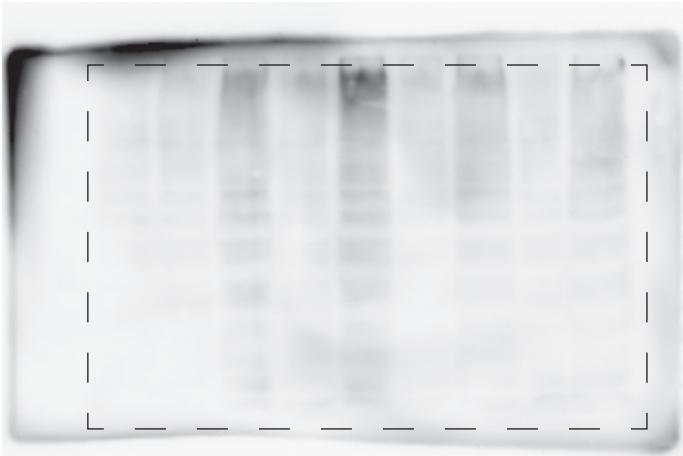

Relevant bands - TAP

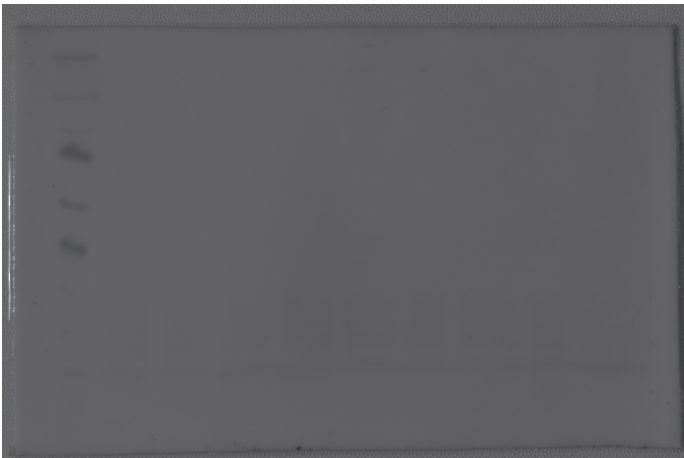

Protein ladder

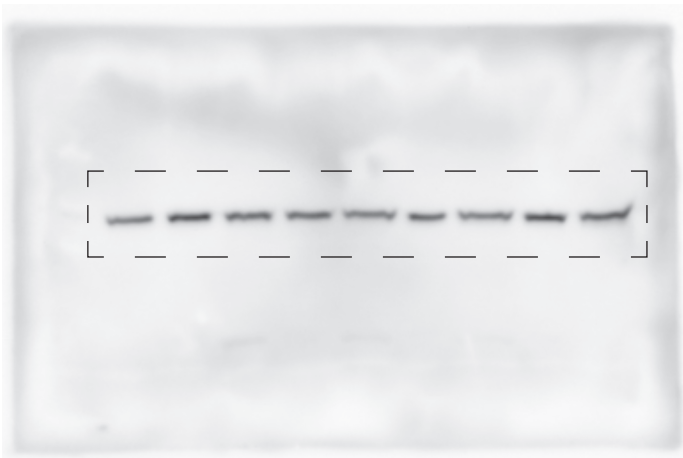

Relevant bands - Pgk1
