# Supplementary material for: Inhibition of mitochondrial protein import and proteostasis by a pro-apoptotic lipid
Source: eLife journal article supplement (doi:10.7554/elife.93621), 2024-01-09

Figure 8A

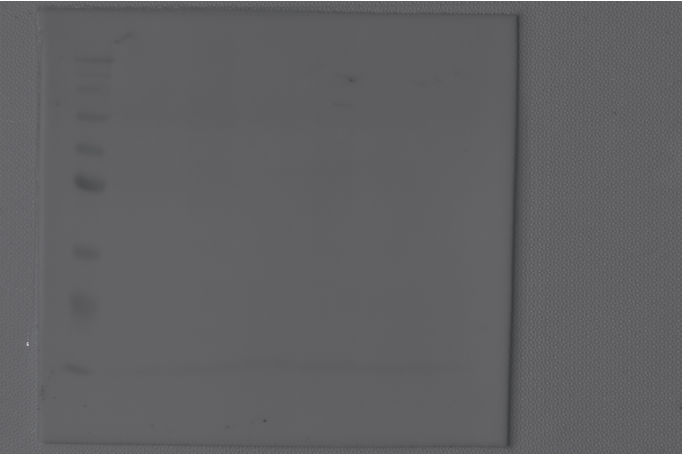

Protein ladder

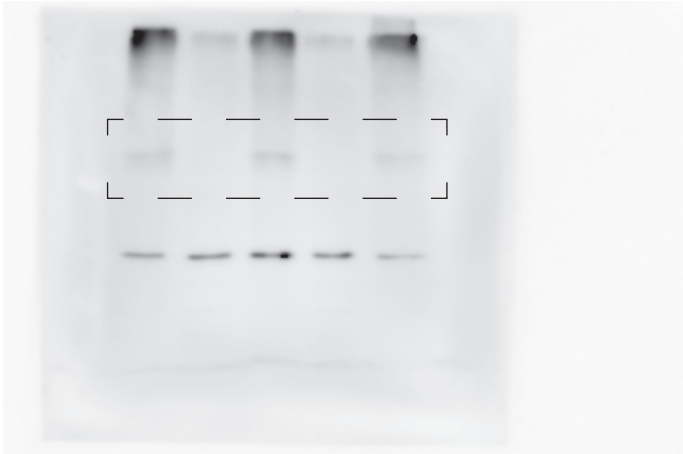

Relevant bands - Input HA

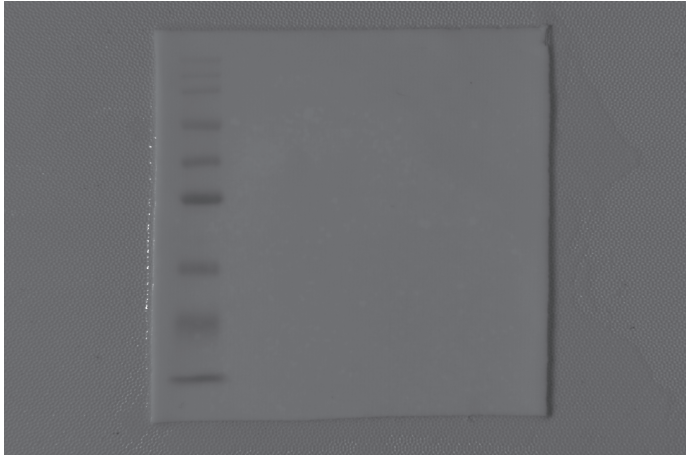

Protein ladder

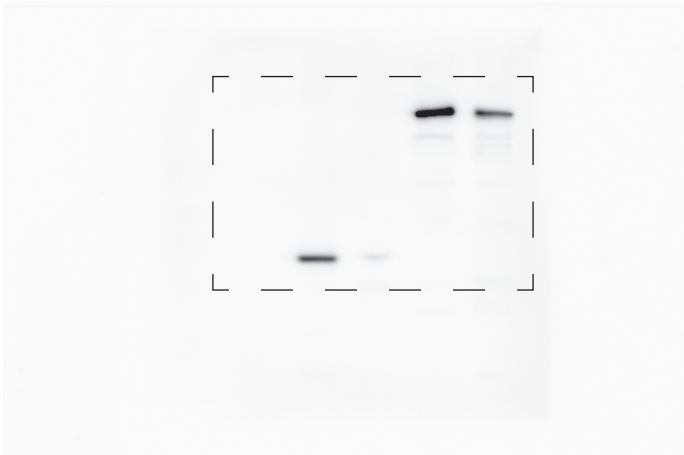

Relevant bands - Pulldown TAP

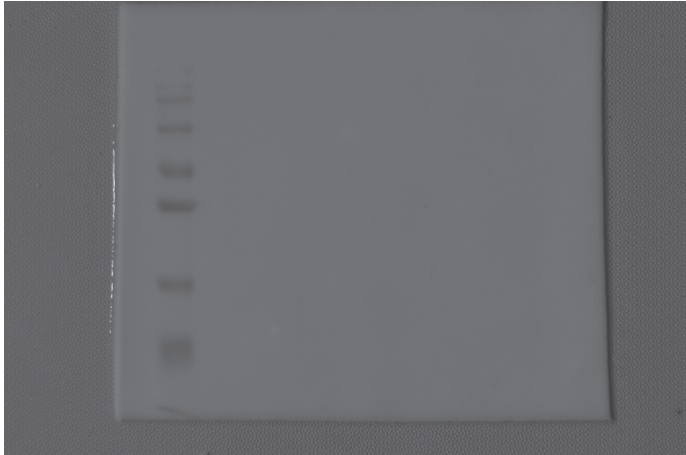

Protein ladder

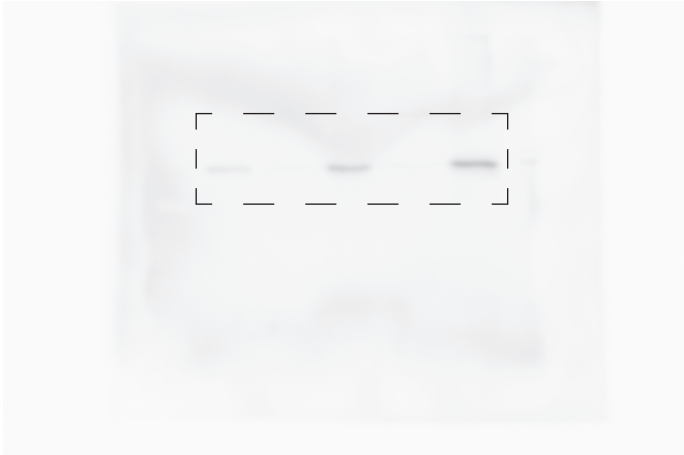

Relevant bands - Pulldown HA

**Figure 8C - Upper panel**

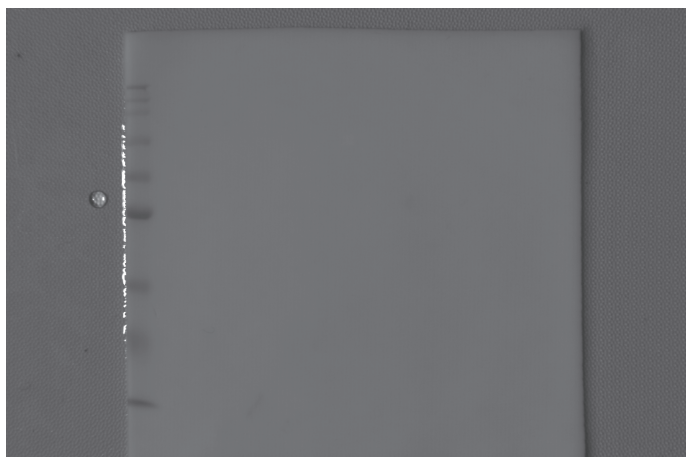

Protein ladder

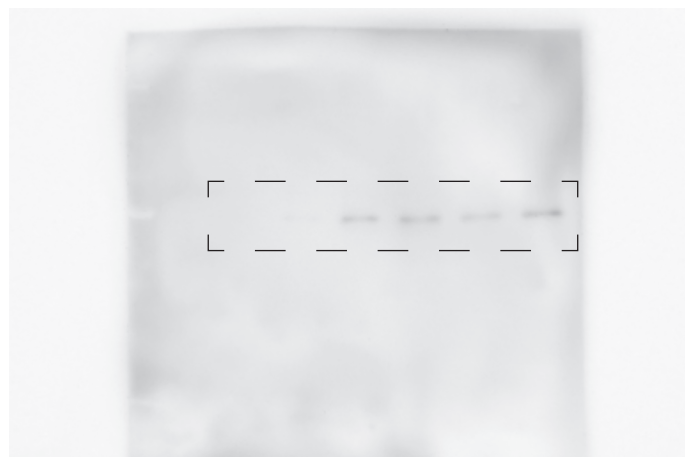

Relevant bands - Pulldown

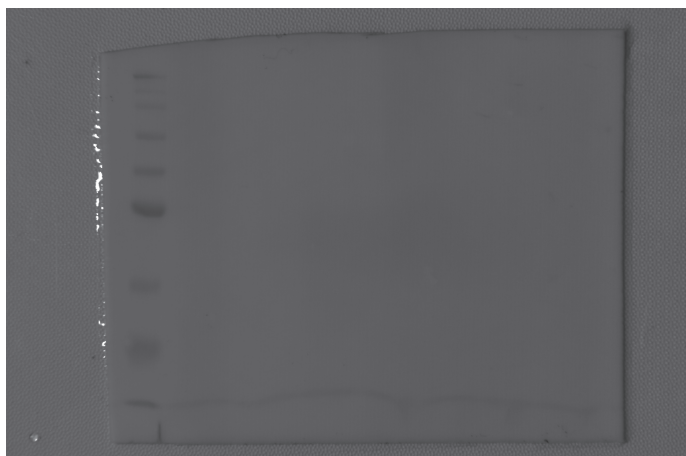

Protein ladder

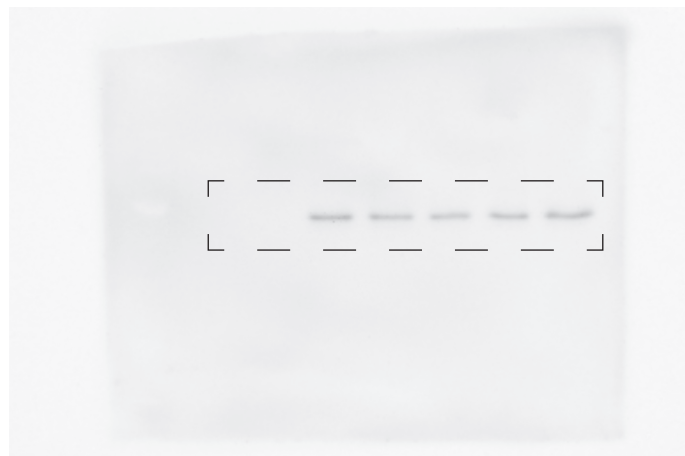

Relevant bands - Input

Figure 8C - Lower panel

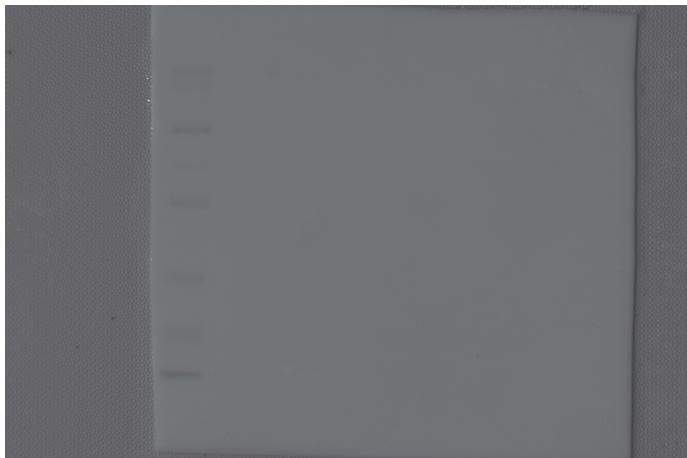

Protein ladder

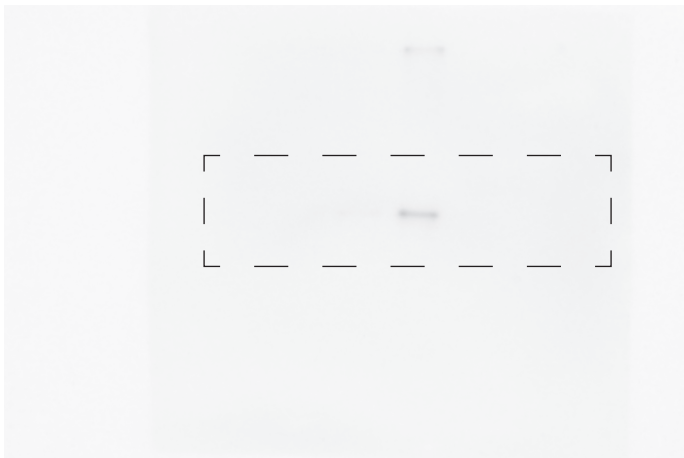

Relevant bands - Pulldown

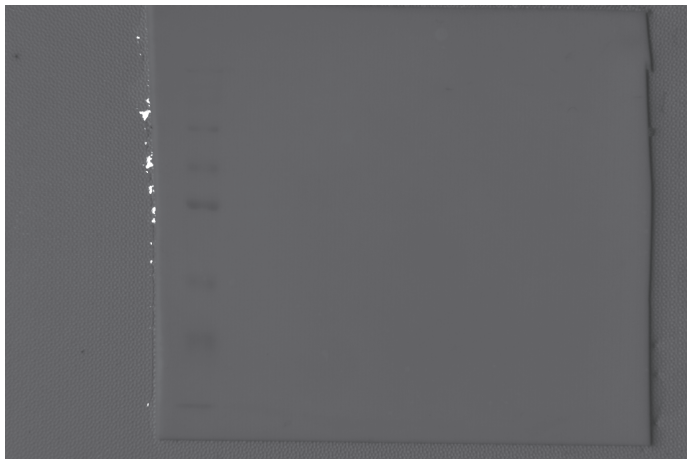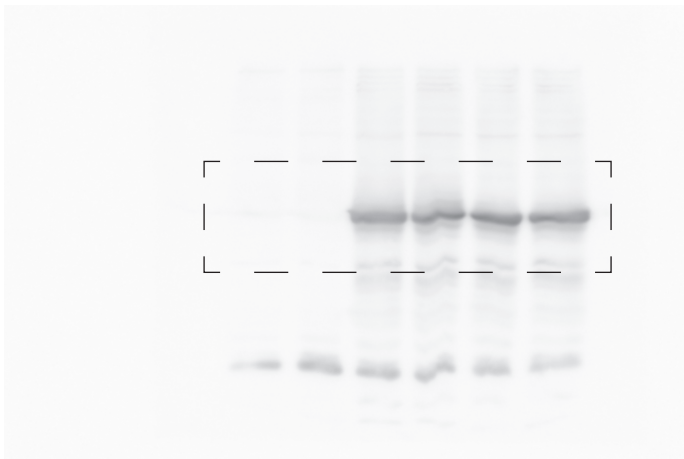

Supplement: fig8-data1 [file elife-93621-fig8-data1-v1.pdf]
