# Supplementary material for: Inhibition of mitochondrial protein import and proteostasis by a pro-apoptotic lipid
Source: eLife journal article supplement (doi:10.7554/elife.93621), 2024-01-09
Supplement: fig8-figsupp1-data1 [file elife-93621-fig8-figsupp1-data1-v1.pdf]

Figure 8 - Figure Supplement 1 - WT

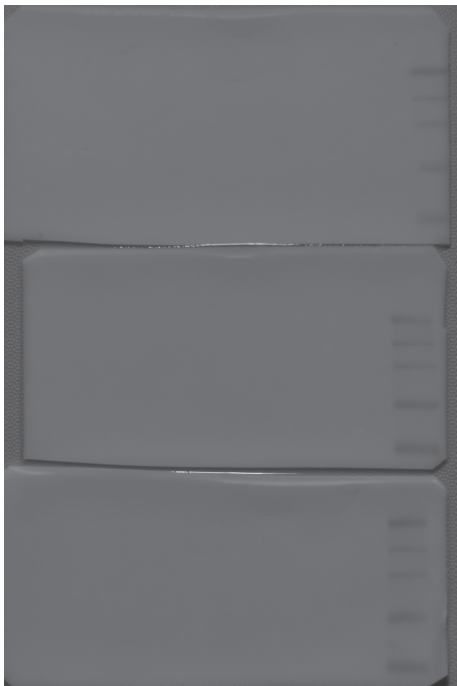

Protein ladder

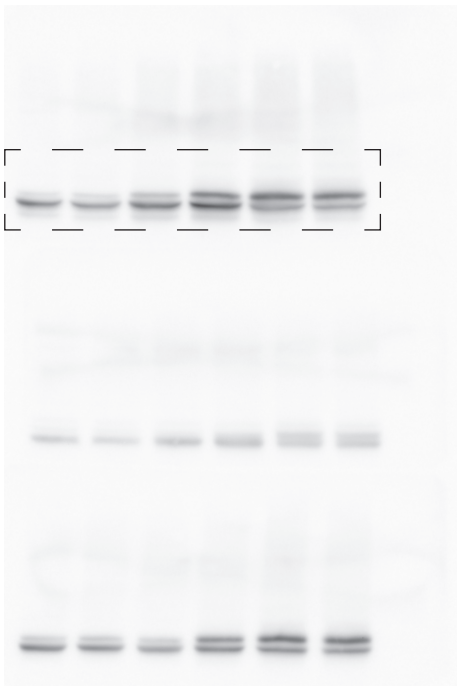

Relevant bands - TAP

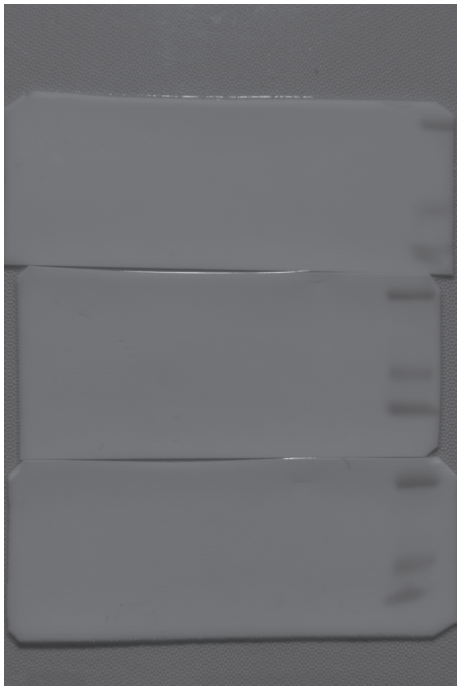

Protein ladder

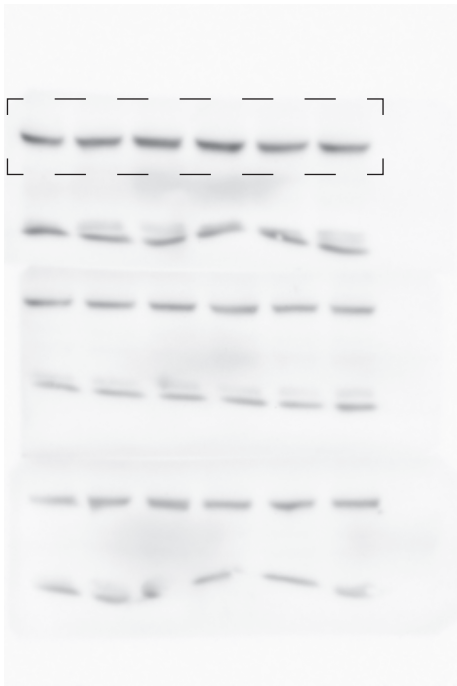

Relevant bands - Pgk1

Figure 8 - Figure Supplement 1 - *tom20*Δ

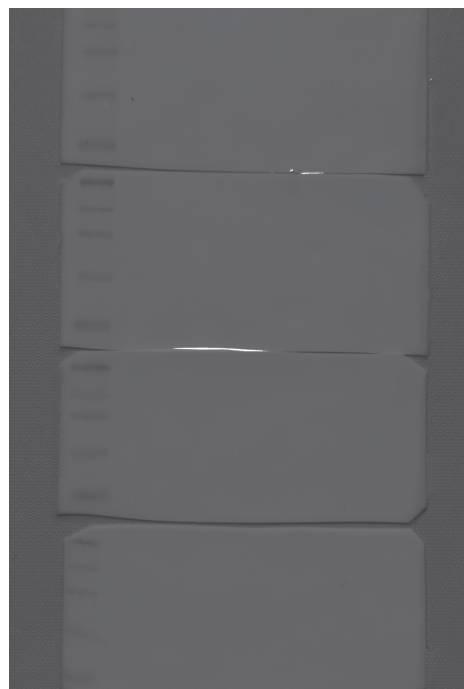

Protein ladder

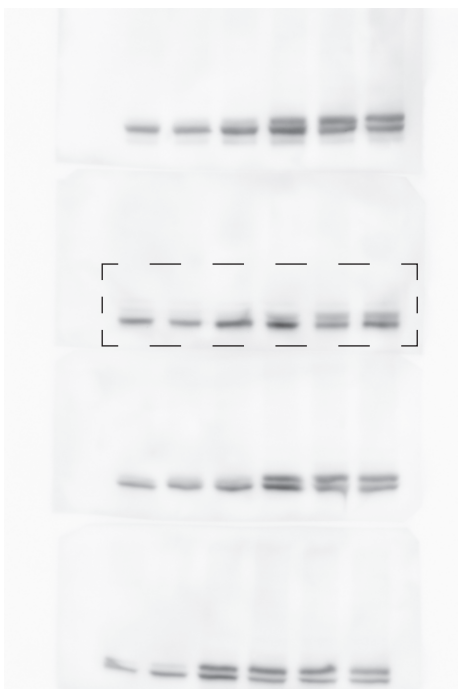

Relevant bands - TAP

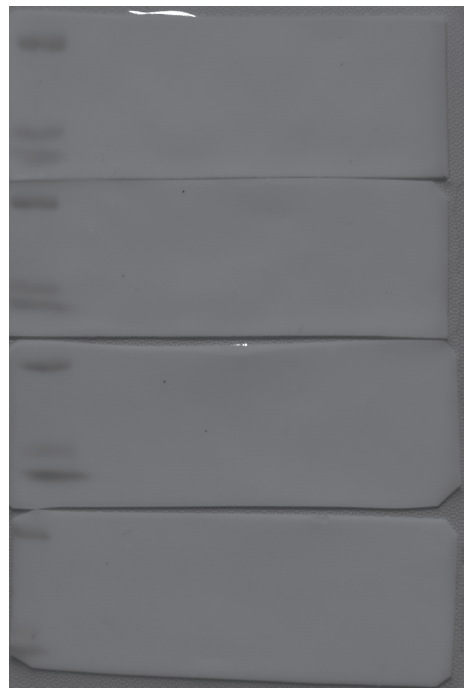

Protein ladder

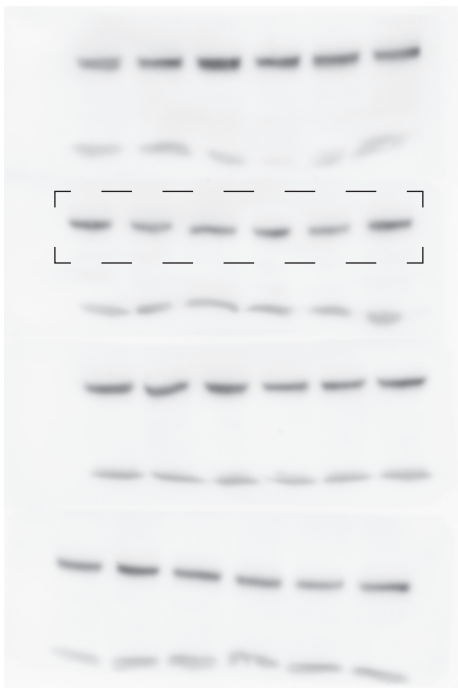

Relevant bands - Pgk1
